# Supplementary material for: Potential effects of surface ozone on forests in Gangwon Province, South Korea, based on critical thresholds
Source: Frontiers journal article supplement (doi:10.3389/ffgc.2022.996859), 2022-09-20
Supplement: Table_1.docx [file Table_1.docx]

Supplementary Material

# Supplementary Figures and Tables

## Supplementary Tables

Supplementary Table 1. Average annual and maximum O3 concentrations in East Gangwon and West Gangwon

|  | **East Gangwon** | | | **West Gangwon** | | |
| --- | --- | --- | --- | --- | --- | --- |
| Year | **Average**  **(ppb)** | **Max** | | **Average**  **(ppb)** | **Max** | |
| **Month** | **O3 (ppb)** | **Month** | **O3 (ppb)** |
| 2001 | 33.49 ± 12.87 | May | 43.68 | 27.30 ± 16.33 | June | 38.29 |
| 2002 | 28.59 ± 12.86 | Feb | 35.90 | 31.26 ± 20.32 | June | 47.93 |
| 2003 | 25.48 ± 13.31 | June | 35.26 | 29.18 ± 21.91 | May | 55.61 |
| 2004 | 30.48 ± 20.98 | Apr | 45.85 | 31.93 ± 23.37 | June | 57.37 |
| 2005 | 28.93 ± 13.78 | June | 39.82 | 28.08 ± 18.91 | June | 44.46 |
| 2006 | 30.55 ± 15.75 | May | 43.73 | 33.19 ± 20.76 | June | 53.93 |
| 2007 | - | - | - | 31.28 ± 21.30 | June | 51.18 |
| 2008 | 33.15 ± 16.92 | Apr | 41.79 | 33.61 ± 20.02 | May | 50.83 |
| 2009 | 35.18 ± 17.83 | Apr | 53.00 | 34.00 ± 23.17 | June | 58.01 |
| 2010 | 30.04 ± 14.92 | May | 43.72 | 30.81 ± 20.64 | June | 50.25 |
| 2011 | 31.05 ± 15.71 | Apr | 44.31 | 31.51 ± 20.02 | June | 53.43 |
| 2012 | 29.02 ± 13.82 | Apr | 38.90 | 34.72 ± 21.38 | June | 60.20 |
| 2013 | 31.18 ± 13.41 | Apr | 41.58 | 34.19 ± 21.14 | May | 54.96 |
| 2014 | 30.32 ± 17.66 | May | 45.06 | 37.75 ± 24.33 | May | 67.87 |
| 2015 | 33.60 ± 15.32 | May | 47.89 | 35.79 ± 23.26 | June | 62.97 |
| 2016 | 33.72 ± 15.57 | May | 48.06 | 34.03 ± 21.62 | June | 55.72 |
| 2017 | 37.32 ± 16.90 | May | 54.48 | 37.02 ± 24.44 | June | 66.17 |
| 2018 | 36.09 ± 19.57 | June | 50.50 | 36.67 ± 22.58 | June | 56.05 |
| Overall average | 29.85 | | | 32.63 | | |

1. “Average” is the average annual O3 concentration. The month and value showing the maximum concentration for each year are indicated. “SUM” indicates the average of all O3 concentrations over 18 years.
